# Supplementary material for: Elucidating the origins of phase transformation hysteresis during electrochemical cycling of Li–Sb electrodes
Source: Royal Society of Chemistry journal article supplement (doi:10.1039/c5ta06183k), 2015-01-01
Supplement: c5ta06183k1.pdf [file c5ta06183k1.pdf]

Supporting Information for

**‘Elucidating the origins of path hysteresis during electrochemical cycling of Li-Sb electrodes’**

Donghee Chang,<sup>a</sup> Hua Huo,<sup>b</sup> Karen E. Johnston,<sup>b</sup> Michel Menetrier,<sup>c,d</sup> Laure Monconduit,<sup>d</sup> Clare P. Grey,<sup>b</sup> and Anton Van der Ven<sup>\*a</sup>

<sup>a</sup>Materials Department, University of California, Santa Barbara, 1361A, Engineering II, Santa Barbara, CA, 93106-5050, USA

<sup>b</sup>Department of Chemistry, University of Cambridge, Lensfield Road, Cambridge, CB2 1EW, United Kingdom

<sup>c</sup>CNRS, Universite de Bordeaux, ICMCB-87 Avenue Schweitzer, Pessac F33600, France

<sup>d</sup>Institut Charles Gerhardt Montpellier-UMR 5253 CNRS, ALISTORE European Research Institute (3104 CNRS), Université Montpellier 2, 34095, Montpellier, France

\* Author to whom correspondence should be addressed

Electronic mail: [avdv@engineering.uscsb.edu](mailto:avdv@engineering.uscsb.edu)

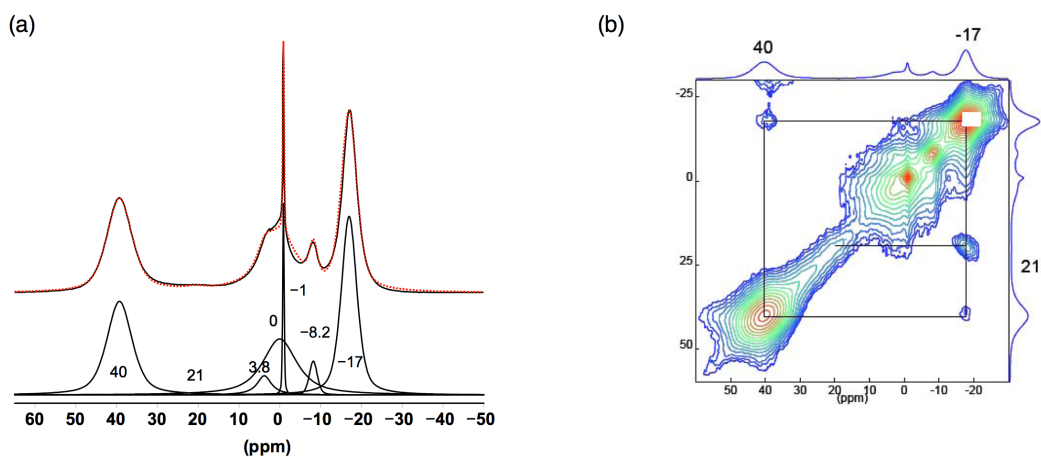

Figure S1: (a)  $^7\text{Li}$  MAS NMR spectrum and deconvolution and (b) two-dimensional  $^7\text{Li}$  exchange NMR spectrum obtained for  $\text{Li}_{1.5}\text{Sb}$  (stopped after 15 hours of discharge), using a mixing time of 10 ms. Spectra were acquired using a MAS rate of 30 kHz.

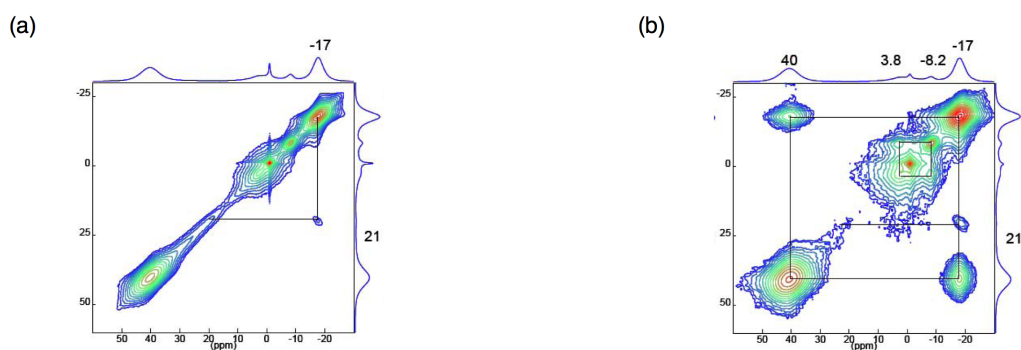

Figure S2: Two-dimensional  $^7\text{Li}$  exchange NMR spectra for  $\text{Li}_{1.5}\text{Sb}$  (stopped after 15 hours of discharge) obtained using mixing times of (a) 0.1 ms and (b) 200 ms. Spectra were acquired using a MAS rate of 30 kHz.

The  ${}^7\text{Li}$  and  ${}^6\text{Li}$  MAS NMR spectra obtained for  $\text{Li}_{2.25}\text{Sb}$  are shown below with the corresponding deconvolutions. Initially the  ${}^7\text{Li}$  NMR spectrum was fitted using the resonances described in the main text. However, it was discovered that an additional resonance was present at 7 ppm. Two-dimensional  ${}^6\text{Li}$  exchange experiments, completed using a mixing time of 50 ms, indicate cross-peaks among the resonances at 7, 3.5 and  $-6$  ppm, suggesting the small resonance at 7 ppm belongs to  $\text{Li}_3\text{Sb}$ . Deconvolution of the  ${}^7\text{Li}$  NMR spectra obtained for further lithiated samples (not shown here) all confirm the existence of the resonance at 7 ppm, suggesting it corresponds to a Li defect site in  $\text{Li}_3\text{Sb}$ .

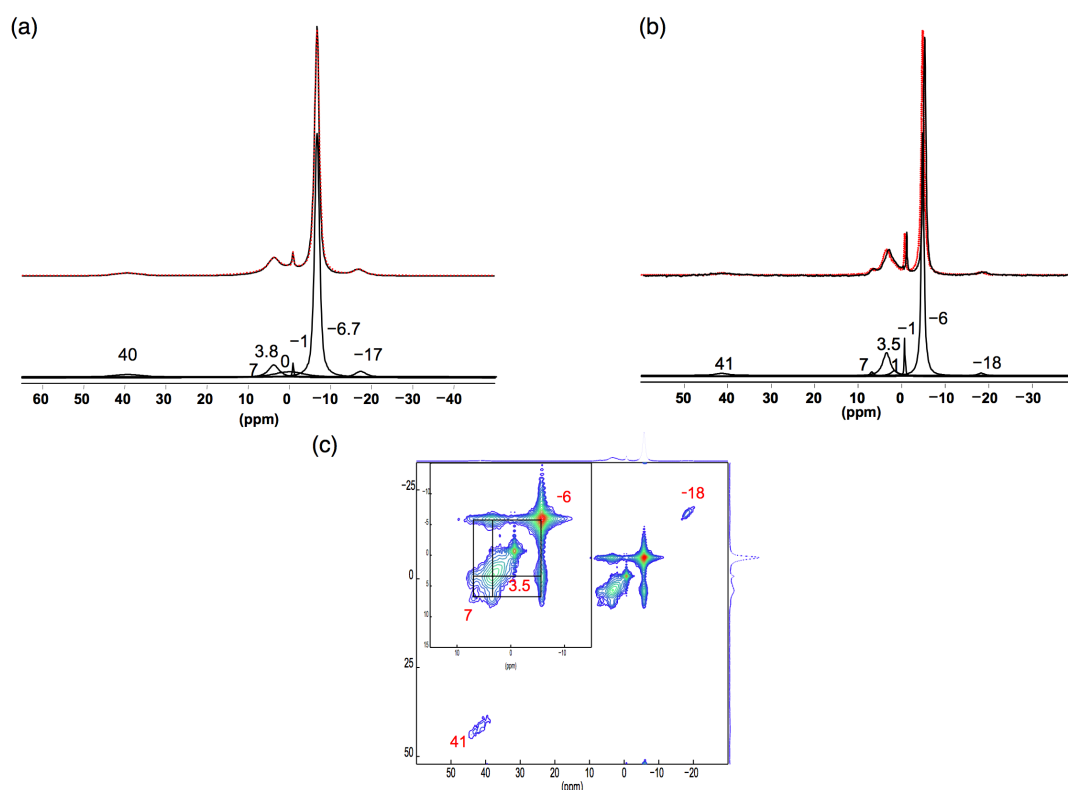

Figure S3: Deconvolution of (a)  ${}^7\text{Li}$  and (b)  ${}^6\text{Li}$  MAS NMR spectra obtained for  $\text{Li}_{2.25}\text{Sb}$  (sample stopped after 22.5 hours of discharge). (c) Two-dimensional  ${}^6\text{Li}$  exchange NMR spectrum for  $\text{Li}_{2.25}\text{Sb}$ , acquired using a mixing time of 50 ms. All spectra were acquired using a MAS rate of 30 kHz.
